# Supplementary material
Source: MDPI journal article supplement (https://www.mdpi.com/2073-4395/12/4/862)
Supplement: s1 [file s1]

**Supplemental Table S1.** Names and pedigree information of wheat parents used in a 10 x 10 half-diallel mating design.

| Parents | Pedigree information                                                       |
|---------|----------------------------------------------------------------------------|
| LM02    | MILAN/KAUZ//PRINIA/3/BAV92/5/TRAP#1/BOW//VEE#5/SARA/3/ZHE JIANG 4/4/DUCULA |
| LM22    | MUNAL#1                                                                    |
| LM32    | ATTILA*2//CHIL/BUC*2/3/KUKUNA                                              |
| LM44    | ROLF07/TUKURU/5/WBLL1*2/4/YACO/PBW65/3/KAUZ*2/TRAP//KAUZ                   |
| LM71    | BABAX/3/PRL/SARA//TSI/VEE#5/4/CROC_1/AE.SQUARROSA (224)//2*OPATA           |
| LM72    | BABAX/3/PRL/SARA//TSI/VEE#5/4/WBLL1                                        |
| LM81    | CROC_1/AE.SQUARROSA (224)//2*OPATA/3/2*RAC655                              |
| LM82    | HD30/5/CNDO/R143//ENTE/MEXI75/3/AE.SQ/4/2*OCI                              |
| LM95    | D67.2/P66.270//AE.SQUARROSA (320)/3/CUNNINGHAM                             |
| LM100   | SW89.5277/BORL95//SKAUZ                                                    |

**Supplemental Table S2.** Mean values for agronomic and physiological traits† evaluated among 10 wheat parents and their progenies under irrigated moisture regime in rainout shelter (RS) and glasshouse (GH) environments.

| Genotypes      | DTM |     | PH  |     | SL    |       | TN     |        | SPS   |       | GPS   |       | GY   |           | TKW   |       | SC     |        | CCI   |       |
|----------------|-----|-----|-----|-----|-------|-------|--------|--------|-------|-------|-------|-------|------|-----------|-------|-------|--------|--------|-------|-------|
|                | RS  | GH  | RS  | GH  | RS    | GH    | R<br>S | G<br>H | RS    | GH    | RS    | GH    | RS   | GH        | RS    | GH    | RS     | GH     | RS    | GH    |
| <b>Parents</b> |     |     |     |     |       |       |        |        |       |       |       |       |      |           |       |       |        |        |       |       |
| LM02           | 99  | 99  | 99  | 101 | 12.41 | 13.71 | 6      | 7      | 15.91 | 18.91 | 39.07 | 38.91 | 6.39 | 7.64      | 57.28 | 56.95 | 152.52 | 212.19 | 35.51 | 37.67 |
| LM22           | 98  | 97  | 90  | 92  | 7.63  | 11.13 | 5      | 6      | 17.83 | 22.58 | 46.17 | 47.96 | 7.71 | 8.49      | 65.82 | 63.56 | 152.97 | 221.05 | 38.72 | 33.03 |
| LM32           | 99  | 97  | 90  | 93  | 12.27 | 10.59 | 5      | 6      | 19.86 | 22.61 | 47.48 | 46.87 | 8.53 | 9.93      | 67.06 | 66.90 | 179.83 | 245.49 | 49.36 | 42.66 |
| LM44           | 99  | 98  | 98  | 100 | 13.93 | 16.32 | 6      | 7      | 19.57 | 21.87 | 44.14 | 46.88 | 6.53 | 7.70      | 65.25 | 65.09 | 183.38 | 228.15 | 47.96 | 45.98 |
| LM71           | 98  | 97  | 96  | 98  | 14.63 | 14.13 | 5      | 6      | 21.51 | 23.81 | 49.53 | 52.02 | 8.72 | 9.70      | 70.12 | 66.45 | 139.92 | 187.48 | 35.88 | 31.09 |
| LM72           | 102 | 102 | 98  | 100 | 13.18 | 15.08 | 6      | 8      | 23.76 | 25.56 | 55.03 | 55.62 | 7.22 | 8.08      | 66.91 | 64.16 | 171.24 | 218.62 | 32.35 | 25.59 |
| LM81           | 103 | 101 | 98  | 101 | 8.27  | 12.22 | 6      | 7      | 17.19 | 19.69 | 39.89 | 42.23 | 7.95 | 9.35      | 66.83 | 66.21 | 221.37 | 284.16 | 35.58 | 38.22 |
| LM82           | 102 | 100 | 100 | 102 | 12.45 | 14.15 | 5      | 6      | 22.06 | 24.41 | 50.88 | 52.32 | 6.15 | 5.29      | 57.22 | 54.34 | 154.43 | 202.06 | 37.39 | 34.43 |
| LM95           | 99  | 98  | 92  | 94  | 10.26 | 11.71 | 6      | 7      | 17.28 | 19.33 | 42.05 | 41.00 | 7.37 | 8.23      | 57.77 | 59.72 | 167.95 | 235.91 | 29.93 | 28.96 |
| LM100          | 103 | 102 | 99  | 101 | 11.16 | 12.71 | 6      | 6      | 19.23 | 20.73 | 46.45 | 44.95 | 7.37 | 7.13      | 68.45 | 66.56 | 169.93 | 230.81 | 44.65 | 39.50 |
| <b>Crosses</b> |     |     |     |     |       |       |        |        |       |       |       |       |      |           |       |       |        |        |       |       |
| LM02×LM100     | 95  | 86  | 98  | 101 | 10.39 | 13.39 | 6      | 7      | 20.78 | 22.08 | 48.31 | 47.95 | 6.30 | 6.45      | 51.91 | 52.16 | 206.21 | 221.05 | 35.57 | 24.97 |
| LM02×LM22      | 96  | 87  | 96  | 97  | 7.24  | 12.79 | 5      | 7      | 18.77 | 23.77 | 43.04 | 50.53 | 6.05 | 5.89      | 61.08 | 62.94 | 159.33 | 145.11 | 46.10 | 36.13 |
| LM02×LM32      | 93  | 82  | 100 | 102 | 10.06 | 10.56 | 6      | 6      | 20.02 | 21.37 | 46.04 | 46.53 | 7.55 | 6.77      | 58.10 | 55.65 | 161.83 | 147.61 | 43.54 | 39.21 |
| LM02×LM81      | 96  | 90  | 72  | 74  | 7.28  | 7.63  | 6      | 7      | 18.39 | 18.24 | 45.77 | 43.82 | 8.69 | 8.38      | 69.29 | 68.81 | 144.86 | 194.55 | 44.13 | 27.35 |
| LM22×LM100     | 96  | 89  | 95  | 98  | 16.12 | 17.57 | 6      | 7      | 21.40 | 24.40 | 43.81 | 51.80 | 8.34 | 9.32      | 69.10 | 65.27 | 166.06 | 210.35 | 26.15 | 19.00 |
| LM22×LM81      | 91  | 77  | 87  | 89  | 15.11 | 14.61 | 5      | 6      | 20.86 | 22.86 | 48.47 | 48.57 | 7.44 | 8.69      | 64.74 | 61.71 | 160.88 | 210.04 | 37.74 | 28.78 |
| LM32×LM100     | 94  | 86  | 91  | 94  | 14.47 | 13.27 | 5      | 7      | 21.68 | 23.18 | 47.37 | 48.71 | 7.70 | 7.54      | 63.91 | 65.97 | 187.83 | 242.69 | 35.17 | 31.22 |
| LM32×LM22      | 95  | 85  | 93  | 99  | 12.15 | 13.80 | 6      | 6      | 19.66 | 22.16 | 46.82 | 47.61 | 7.46 | 8.24      | 66.07 | 63.86 | 177.53 | 284.16 | 47.85 | 43.58 |
| LM32×LM81      | 98  | 89  | 96  | 98  | 12.38 | 13.68 | 6      | 7      | 21.79 | 23.14 | 50.48 | 50.32 | 5.81 | 5.03      | 60.28 | 58.13 | 185.09 | 250.91 | 43.21 | 32.46 |
| LM44×LM02      | 96  | 87  | 95  | 98  | 15.07 | 17.17 | 5      | 7      | 20.08 | 23.58 | 45.91 | 49.85 | 6.99 | 7.73      | 62.56 | 64.63 | 208.48 | 231.07 | 38.76 | 30.99 |
| LM44×LM100     | 97  | 86  | 98  | 100 | 14.38 | 16.14 | 6      | 6      | 20.89 | 23.89 | 49.28 | 51.12 | 8.47 | 9.52      | 68.30 | 67.84 | 177.42 | 195.99 | 43.08 | 43.12 |
| LM44×LM22      | 95  | 86  | 100 | 102 | 15.36 | 17.06 | 5      | 6      | 20.15 | 22.45 | 39.80 | 48.94 | 7.77 | 8.63      | 67.66 | 69.72 | 178.71 | 220.27 | 47.91 | 35.08 |
| LM44×LM32      | 97  | 88  | 84  | 97  | 8.08  | 10.68 | 6      | 7      | 19.53 | 24.53 | 50.07 | 51.86 | 6.19 | 6.78      | 55.51 | 52.46 | 189.14 | 239.02 | 32.49 | 24.42 |
| LM44×LM81      | 94  | 86  | 96  | 98  | 11.82 | 13.52 | 5      | 6      | 18.00 | 20.80 | 43.51 | 43.85 | 6.78 | 7.48      | 61.74 | 58.49 | 167.86 | 212.19 | 42.14 | 48.72 |
| LM71×LM02      | 92  | 85  | 91  | 97  | 13.57 | 14.97 | 5      | 6      | 19.04 | 21.54 | 45.58 | 47.32 | 7.40 | 8.54      | 66.42 | 66.46 | 166.59 | 147.63 | 45.14 | 42.11 |
| LM71×LM100     | 97  | 88  | 95  | 97  | 13.93 | 14.63 | 5      | 7      | 21.73 | 23.63 | 49.92 | 47.51 | 8.75 | 10.0<br>0 | 62.18 | 61.72 | 182.52 | 242.57 | 42.10 | 31.03 |
| LM71×LM22      | 93  | 84  | 95  | 98  | 9.30  | 13.20 | 0      | 7      | 16.04 | 19.04 | 39.09 | 41.78 | 6.00 | 7.10      | 61.46 | 57.99 | 152.73 | 210.20 | 36.10 | 23.86 |
| LM71×LM32      | 93  | 83  | 97  | 99  | 12.24 | 13.69 | 5      | 6      | 20.97 | 22.87 | 46.45 | 49.74 | 8.69 | 10.0<br>2 | 71.21 | 70.81 | 174.06 | 238.91 | 42.92 | 29.13 |
| LM71×LM44      | 95  | 86  | 96  | 101 | 11.21 | 12.96 | 5      | 6      | 20.36 | 22.86 | 46.72 | 48.86 | 9.24 | 10.1<br>0 | 72.24 | 68.89 | 157.12 | 220.13 | 43.28 | 38.12 |

|            |      |      |       |       |       |       |      |      |       |       |       |       |      |       |       |       |        |        |       |       |
|------------|------|------|-------|-------|-------|-------|------|------|-------|-------|-------|-------|------|-------|-------|-------|--------|--------|-------|-------|
| LM71×LM72  | 95   | 85   | 80    | 87    | 11.93 | 13.53 | 6    | 7    | 16.03 | 18.53 | 38.95 | 40.30 | 7.23 | 8.56  | 68.23 | 67.73 | 166.69 | 225.96 | 41.06 | 23.76 |
| LM71×LM81  | 97   | 89   | 99    | 101   | 8.86  | 12.11 | 5    | 6    | 17.34 | 23.74 | 49.43 | 50.17 | 9.68 | 10.86 | 71.70 | 68.29 | 164.85 | 248.36 | 51.46 | 40.20 |
| LM71×LM95  | 95   | 82   | 94    | 96    | 16.31 | 17.31 | 6    | 8    | 18.29 | 19.79 | 44.07 | 42.72 | 7.37 | 7.45  | 67.83 | 64.65 | 176.00 | 240.28 | 40.59 | 24.90 |
| LM72×LM02  | 95   | 93   | 93    | 95    | 9.54  | 11.14 | 6    | 7    | 22.05 | 24.05 | 51.00 | 51.65 | 6.76 | 6.44  | 53.05 | 49.92 | 151.39 | 251.62 | 42.33 | 36.51 |
| LM72×LM100 | 98   | 88   | 95    | 96    | 14.97 | 16.32 | 5    | 6    | 19.90 | 19.40 | 39.80 | 41.55 | 7.63 | 8.33  | 70.51 | 67.54 | 177.80 | 176.90 | 48.03 | 23.57 |
| LM72×LM22  | 96   | 88   | 99    | 101   | 13.86 | 15.31 | 6    | 7    | 18.72 | 20.72 | 44.45 | 45.39 | 8.19 | 9.13  | 69.93 | 67.80 | 182.55 | 163.34 | 42.47 | 35.31 |
| LM72×LM32  | 94   | 87   | 103   | 105   | 7.95  | 11.35 | 5    | 6    | 18.16 | 20.16 | 43.82 | 44.37 | 7.60 | 8.74  | 63.37 | 63.06 | 143.51 | 195.61 | 42.86 | 29.72 |
| LM72×LM44  | 102  | 93   | 86    | 88    | 11.64 | 13.24 | 6    | 6    | 21.91 | 23.56 | 44.82 | 51.61 | 6.71 | 7.65  | 65.43 | 67.51 | 192.52 | 191.11 | 41.59 | 28.47 |
| LM72×LM81  | 96   | 89   | 86    | 88    | 11.60 | 13.13 | 6    | 7    | 19.88 | 21.78 | 46.77 | 46.91 | 6.51 | 7.84  | 60.36 | 59.91 | 167.82 | 222.62 | 37.22 | 32.02 |
| LM72×LM95  | 96   | 86   | 97    | 99    | 8.87  | 11.17 | 6    | 7    | 20.35 | 23.15 | 47.69 | 45.09 | 7.11 | 8.21  | 47.15 | 43.84 | 182.47 | 254.33 | 33.78 | 33.89 |
| LM81×LM100 | 94   | 86   | 88    | 90    | 9.98  | 11.63 | 5    | 6    | 16.45 | 18.95 | 39.79 | 41.29 | 7.92 | 8.78  | 66.93 | 68.93 | 163.82 | 211.39 | 39.24 | 30.68 |
| LM82×LM02  | 94   | 84   | 98    | 100   | 12.23 | 13.08 | 5    | 6    | 21.45 | 23.75 | 49.65 | 51.40 | 7.29 | 8.07  | 58.22 | 56.16 | 154.44 | 206.22 | 35.50 | 26.67 |
| LM82×LM100 | 95   | 86   | 100   | 102   | 10.09 | 11.89 | 5    | 6    | 18.32 | 23.22 | 43.65 | 49.54 | 7.34 | 8.12  | 62.84 | 59.48 | 171.28 | 164.89 | 30.26 | 21.46 |
| LM82×LM22  | 95   | 86   | 89    | 97    | 10.44 | 14.77 | 6    | 8    | 19.62 | 22.47 | 48.24 | 48.28 | 7.67 | 6.97  | 66.43 | 68.42 | 177.55 | 245.17 | 35.28 | 25.68 |
| LM82×LM32  | 94   | 88   | 92    | 95    | 13.18 | 14.23 | 5    | 6    | 23.01 | 24.26 | 47.03 | 52.27 | 6.52 | 6.75  | 58.79 | 58.58 | 209.03 | 228.15 | 38.67 | 40.09 |
| LM82×LM44  | 98   | 89   | 90    | 92    | 16.47 | 18.02 | 6    | 7    | 16.50 | 20.55 | 40.50 | 41.14 | 7.83 | 8.77  | 67.83 | 67.63 | 175.43 | 174.36 | 39.30 | 17.66 |
| LM82×LM71  | 98   | 88   | 80    | 83    | 9.80  | 12.34 |      |      | 17.00 | 19.30 | 40.89 | 42.69 | 8.57 | 9.82  | 70.86 | 70.81 | 140.66 | 134.56 | 33.28 | 29.90 |
| LM82×LM72  | 97   | 88   | 72    | 74    | 9.18  | 11.23 | 5    | 7    | 18.04 | 19.54 | 43.08 | 42.08 | 6.26 | 7.27  | 55.81 | 57.94 | 187.71 | 244.35 | 44.44 | 44.80 |
| LM82×LM81  | 95   | 85   | 100   | 102   | 9.25  | 14.12 | 6    | 6    | 20.76 | 23.56 | 44.52 | 50.41 | 6.25 | 7.42  | 61.72 | 61.61 | 181.55 | 225.70 | 44.86 | 39.06 |
| LM82×LM95  | 94   | 84   | 95    | 100   | 8.58  | 11.06 | 5    | 5    | 20.27 | 22.12 | 47.55 | 47.09 | 7.52 | 7.13  | 68.07 | 67.46 | 152.02 | 215.90 | 26.97 | 19.40 |
| LM95×LM02  | 97   | 88   | 96    | 100   | 12.16 | 13.91 | 5    | 6    | 18.83 | 20.83 | 45.41 | 44.71 | 9.01 | 9.09  | 71.60 | 68.22 | 175.54 | 169.34 | 39.88 | 33.29 |
| LM95×LM100 | 93   | 81   | 101   | 103   | 7.33  | 10.53 | 5    | 7    | 15.93 | 21.58 | 46.76 | 46.35 | 7.33 | 6.86  | 50.06 | 46.72 | 174.75 | 168.69 | 38.31 | 35.85 |
| LM95×LM22  | 96   | 87   | 97    | 102   | 9.15  | 11.00 | 6    | 7    | 17.60 | 21.20 | 45.20 | 44.99 | 7.53 | 8.23  | 67.92 | 64.84 | 160.94 | 271.24 | 42.38 | 36.84 |
| LM95×LM32  | 94   | 85   | 100   | 102   | 10.26 | 13.01 | 5    | 6    | 21.78 | 23.18 | 48.57 | 49.61 | 8.19 | 9.05  | 69.31 | 67.15 | 187.84 | 242.72 | 39.92 | 32.12 |
| LM95×LM44  | 102  | 93   | 99    | 102   | 15.45 | 17.05 | 5    | 6    | 22.99 | 25.34 | 53.49 | 54.23 | 7.09 | 6.70  | 63.41 | 63.10 | 152.28 | 234.30 | 40.53 | 46.68 |
| LM95×LM81  | 94   | 83   | 95    | 97    | 15.21 | 16.61 | 6    | 6    | 21.11 | 23.36 | 43.12 | 49.36 | 8.86 | 9.53  | 70.16 | 67.66 | 158.31 | 231.40 | 46.32 | 50.35 |
| Mean       | 96   | 89   | 94    | 97    | 11.65 | 13.49 | 5    | 6    | 19.57 | 22.07 | 45.73 | 47.28 | 7.48 | 8.10  | 64.07 | 62.88 | 171.39 | 217.33 | 39.95 | 33.18 |
| P-value    | **   | **   | ns    | **    | **    | **    | ns   | ns   | *     | *     | ns    | ns    | **   | *     | *     | ns    | ns     | ns     | ns    | ns    |
| SED‡       | 2.50 | 3.01 | 6.51  | 5.25  | 1.20  | 1.79  | 0.76 | 1.02 | 2.23  | 2.07  | 5.14  | 4.46  | 0.49 | 1.27  | 6.64  | 7.33  | 21.21  | 46.59  | 8.36  | 9.85  |
| LSD (5%)§  | 5.01 | 6.04 | 13.05 | 10.52 | 2.41  | 3.60  | 1.52 | 2.05 | 4.48  | 4.15  | 10.31 | 8.90  | 1.45 | 2.54  | 13.31 | 14.69 | 42.53  | 93.40  | 16.77 | 19.74 |

|         |      |      |      |      |       |       |               |               |       |      |       |      |           |           |       |       |       |       |       |       |
|---------|------|------|------|------|-------|-------|---------------|---------------|-------|------|-------|------|-----------|-----------|-------|-------|-------|-------|-------|-------|
| CV (%)¶ | 2.60 | 3.40 | 6.90 | 5.40 | 10.30 | 13.30 | 13<br>.9<br>0 | 15<br>.8<br>0 | 11.40 | 9.40 | 11.20 | 9.40 | 10.5<br>0 | 15.6<br>0 | 10.40 | 11.70 | 12.40 | 21.40 | 20.90 | 29.70 |
|---------|------|------|------|------|-------|-------|---------------|---------------|-------|------|-------|------|-----------|-----------|-------|-------|-------|-------|-------|-------|

---

\* and \*\* denotes significant at 5 and 1% probability levels, respectively.

† DTM, Number of days to maturity; PH, Plant height; SL, Spike length; TN, Number of productive tillers; SPS, Number of spikelets per spike; GPS, Grain per spike; GY, Grain yield; TKW, Thousand-kernel weight; SC, Stomatal conductance; CCI, Chlorophyll content index.

‡ SED, Standard error of difference.

§ LSD, Least significant difference.

¶ CV, Coefficient of variation.

**Supplemental Table S3.** Mean values for agronomic and physiological traits† evaluated among 10 wheat parents and their progenies under terminal drought moisture regime in rainout shelter (RS) and glasshouse (GH) environments.

| Genotypes      | DTM |     | PH |     | SL    |       | TN |    | SPS   |       | GPS   |       | GY   |      | TKW   |       | SC    |       | CCI   |       |
|----------------|-----|-----|----|-----|-------|-------|----|----|-------|-------|-------|-------|------|------|-------|-------|-------|-------|-------|-------|
|                | RS  | GH  | RS | GH  | RS    | GH    | RS | GH | RS    | GH    | RS    | GH    | RS   | GH   | RS    | GH    | RS    | GH    | RS    | GH    |
| <b>Parents</b> |     |     |    |     |       |       |    |    |       |       |       |       |      |      |       |       |       |       |       |       |
| LM02           | 88  | 98  | 93 | 104 | 9.32  | 9.80  | 5  | 5  | 17.95 | 14.62 | 39.80 | 31.38 | 3.06 | 3.85 | 24.22 | 32.67 | 33.84 | 63.05 | 25.64 | 13.49 |
| LM22           | 98  | 98  | 93 | 97  | 9.78  | 4.01  | 6  | 5  | 21.26 | 19.24 | 46.79 | 42.48 | 5.35 | 5.81 | 22.21 | 40.82 | 59.07 | 75.19 | 31.49 | 16.75 |
| LM32           | 89  | 98  | 77 | 93  | 8.17  | 5.56  | 5  | 6  | 18.81 | 18.82 | 41.65 | 41.14 | 3.95 | 4.19 | 25.30 | 40.24 | 56.44 | 88.44 | 29.08 | 16.25 |
| LM44           | 89  | 98  | 95 | 106 | 11.36 | 12.25 | 6  | 8  | 22.45 | 20.08 | 38.72 | 43.91 | 5.36 | 3.60 | 30.30 | 43.96 | 47.99 | 48.17 | 32.46 | 19.47 |
| LM71           | 90  | 98  | 78 | 99  | 6.54  | 12.66 | 6  | 6  | 13.92 | 20.89 | 39.67 | 44.88 | 3.62 | 5.84 | 27.38 | 37.91 | 63.55 | 79.09 | 25.24 | 15.97 |
| LM72           | 105 | 102 | 94 | 100 | 11.18 | 10.98 | 6  | 7  | 23.74 | 22.10 | 47.97 | 47.30 | 3.53 | 2.63 | 26.36 | 44.39 | 43.00 | 45.62 | 20.25 | 13.30 |
| LM81           | 91  | 102 | 94 | 99  | 11.16 | 9.15  | 5  | 6  | 21.08 | 17.88 | 46.60 | 40.31 | 4.09 | 3.07 | 26.95 | 40.09 | 33.37 | 38.94 | 24.01 | 19.72 |
| LM82           | 101 | 101 | 88 | 98  | 8.36  | 9.93  | 6  | 4  | 17.40 | 21.31 | 38.10 | 46.06 | 3.88 | 4.81 | 21.08 | 27.84 | 53.75 | 62.59 | 22.93 | 14.81 |
| LM95           | 101 | 98  | 93 | 92  | 12.48 | 9.00  | 6  | 7  | 21.30 | 16.18 | 46.37 | 38.86 | 3.59 | 3.06 | 27.26 | 41.26 | 65.41 | 43.77 | 24.28 | 11.97 |
| LM100          | 98  | 102 | 95 | 103 | 9.42  | 7.14  | 6  | 8  | 17.36 | 17.59 | 46.26 | 40.23 | 3.48 | 3.98 | 23.78 | 35.12 | 64.07 | 65.67 | 29.76 | 19.25 |
| <b>Crosses</b> |     |     |    |     |       |       |    |    |       |       |       |       |      |      |       |       |       |       |       |       |
| LM02×LM100     | 92  | 79  | 92 | 103 | 7.60  | 7.36  | 6  | 5  | 19.24 | 19.02 | 47.22 | 40.94 | 3.66 | 3.64 | 25.95 | 32.12 | 48.29 | 66.38 | 28.55 | 12.92 |
| LM02×LM22      | 101 | 79  | 91 | 98  | 10.58 | 7.77  | 5  | 6  | 18.29 | 20.60 | 39.67 | 43.60 | 5.04 | 2.86 | 28.66 | 27.70 | 59.56 | 47.30 | 23.09 | 14.01 |
| LM02×LM32      | 90  | 75  | 94 | 100 | 11.98 | 6.96  | 6  | 8  | 20.84 | 18.58 | 45.82 | 39.57 | 4.40 | 4.79 | 27.90 | 29.14 | 63.29 | 79.41 | 26.43 | 14.21 |
| LM02×LM81      | 87  | 82  | 94 | 71  | 9.49  | 5.85  | 6  | 8  | 18.00 | 15.00 | 40.89 | 46.50 | 3.97 | 4.90 | 23.12 | 46.34 | 61.06 | 65.80 | 33.00 | 14.46 |
| LM22×LM100     | 91  | 82  | 92 | 97  | 6.15  | 13.26 | 6  | 5  | 16.28 | 20.81 | 44.46 | 45.73 | 4.25 | 2.28 | 21.15 | 35.02 | 57.43 | 49.65 | 27.94 | 10.30 |
| LM22×LM81      | 94  | 69  | 88 | 81  | 11.40 | 12.39 | 5  | 4  | 16.92 | 19.85 | 39.47 | 43.05 | 5.65 | 4.10 | 22.42 | 40.24 | 64.39 | 59.27 | 31.76 | 11.84 |
| LM32×LM100     | 89  | 77  | 87 | 96  | 11.04 | 11.41 | 6  | 6  | 21.35 | 20.17 | 46.79 | 43.68 | 3.43 | 5.10 | 27.92 | 30.19 | 47.17 | 90.42 | 29.58 | 15.45 |
| LM32×LM22      | 96  | 78  | 89 | 102 | 7.68  | 10.08 | 6  | 5  | 17.48 | 18.80 | 47.16 | 42.15 | 4.18 | 3.81 | 23.28 | 30.61 | 58.74 | 28.13 | 19.25 | 21.18 |
| LM32×LM81      | 95  | 80  | 89 | 95  | 10.84 | 8.45  | 6  | 7  | 19.21 | 20.98 | 44.65 | 45.46 | 4.60 | 2.58 | 23.30 | 38.60 | 52.59 | 43.13 | 30.80 | 13.01 |
| LM44×LM02      | 92  | 80  | 91 | 99  | 12.23 | 13.38 | 5  | 5  | 21.66 | 20.97 | 47.01 | 45.99 | 5.04 | 4.38 | 26.04 | 33.89 | 69.21 | 75.55 | 23.50 | 15.58 |
| LM44×LM100     | 90  | 80  | 96 | 102 | 12.91 | 9.45  | 6  | 8  | 20.99 | 20.73 | 43.39 | 44.06 | 4.36 | 5.00 | 26.33 | 31.17 | 70.64 | 69.67 | 30.26 | 18.64 |
| LM44×LM22      | 88  | 77  | 91 | 105 | 13.57 | 12.21 | 5  | 7  | 22.99 | 19.42 | 39.05 | 41.64 | 5.45 | 5.37 | 24.78 | 31.51 | 47.41 | 82.22 | 26.76 | 14.06 |
| LM44×LM32      | 101 | 79  | 95 | 99  | 11.53 | 7.52  | 6  | 8  | 19.51 | 22.37 | 43.03 | 47.24 | 3.51 | 3.92 | 28.48 | 34.51 | 44.11 | 59.97 | 33.94 | 11.01 |
| LM44×LM81      | 91  | 78  | 80 | 105 | 7.58  | 10.24 | 6  | 5  | 22.29 | 18.99 | 44.51 | 40.72 | 4.69 | 2.92 | 21.20 | 33.21 | 55.73 | 34.85 | 20.99 | 18.12 |
| LM71×LM02      | 88  | 77  | 84 | 100 | 10.77 | 10.96 | 7  | 6  | 20.50 | 18.01 | 44.28 | 36.63 | 3.22 | 4.41 | 25.12 | 40.10 | 74.18 | 76.81 | 22.43 | 18.44 |
| LM71×LM100     | 89  | 80  | 83 | 96  | 8.03  | 11.68 | 6  | 5  | 16.62 | 22.09 | 37.29 | 46.88 | 4.40 | 4.23 | 27.57 | 45.28 | 62.97 | 64.81 | 25.99 | 12.74 |
| LM71×LM22      | 86  | 76  | 94 | 101 | 8.54  | 6.23  | 5  | 5  | 18.03 | 17.19 | 40.19 | 39.64 | 3.08 | 5.36 | 26.62 | 28.07 | 53.00 | 63.95 | 9.61  | 11.41 |
| LM71×LM32      | 90  | 77  | 96 | 95  | 9.82  | 8.78  | 6  | 6  | 19.85 | 19.97 | 45.16 | 38.00 | 4.32 | 5.03 | 24.36 | 34.50 | 73.00 | 78.19 | 34.84 | 14.82 |
| LM71×LM44      | 90  | 78  | 87 | 101 | 11.68 | 8.49  | 5  | 6  | 23.06 | 20.14 | 45.12 | 38.84 | 4.72 | 5.44 | 23.34 | 38.47 | 67.15 | 79.85 | 25.92 | 16.64 |
| LM71×LM72      | 87  | 76  | 85 | 88  | 14.67 | 8.30  | 6  | 6  | 17.49 | 16.45 | 41.84 | 36.85 | 4.12 | 3.48 | 28.06 | 39.24 | 49.95 | 64.29 | 22.65 | 11.54 |
| LM71×LM81      | 105 | 81  | 94 | 100 | 8.27  | 3.70  | 6  | 6  | 16.90 | 20.61 | 37.88 | 43.98 | 4.93 | 4.55 | 28.16 | 34.44 | 44.27 | 73.17 | 27.58 | 15.93 |
| LM71×LM95      | 89  | 74  | 92 | 97  | 9.83  | 13.86 | 5  | 5  | 21.61 | 16.63 | 46.75 | 36.47 | 3.79 | 2.67 | 21.56 | 39.54 | 46.57 | 34.17 | 20.75 | 10.96 |
| LM72×LM02      | 98  | 84  | 90 | 96  | 8.04  | 9.26  | 5  | 5  | 20.11 | 22.38 | 48.10 | 47.65 | 3.87 | 3.87 | 21.37 | 32.87 | 61.25 | 60.13 | 30.81 | 20.99 |

|            |      |      |           |      |       |       |           |           |       |       |       |       |       |       |       |       |       |       |       |       |
|------------|------|------|-----------|------|-------|-------|-----------|-----------|-------|-------|-------|-------|-------|-------|-------|-------|-------|-------|-------|-------|
| LM72×LM100 | 91   | 81   | 90        | 101  | 12.07 | 9.95  | 5         | 7         | 16.42 | 15.81 | 37.10 | 34.67 | 5.31  | 4.37  | 28.52 | 39.73 | 65.27 | 82.36 | 27.38 | 10.61 |
| LM72×LM22  | 89   | 79   | 93        | 102  | 11.76 | 11.44 | 6         | 5         | 17.73 | 19.13 | 42.09 | 41.86 | 3.55  | 3.03  | 28.36 | 41.23 | 43.73 | 46.51 | 29.32 | 17.04 |
| LM72×LM32  | 97   | 80   | 99        | 106  | 10.50 | 8.40  | 6         | 5         | 19.31 | 16.53 | 44.92 | 35.87 | 3.79  | 2.29  | 24.08 | 33.32 | 31.93 | 46.49 | 23.11 | 12.38 |
| LM72×LM44  | 97   | 86   | 80        | 77   | 13.84 | 14.15 | 6         | 5         | 22.06 | 20.87 | 47.96 | 44.84 | 5.50  | 3.60  | 28.16 | 28.64 | 61.28 | 62.21 | 29.44 | 12.45 |
| LM72×LM81  | 87   | 82   | 80        | 86   | 10.15 | 9.37  | 5         | 6         | 19.41 | 18.75 | 38.86 | 55.86 | 4.48  | 2.77  | 27.13 | 43.52 | 45.15 | 46.62 | 24.87 | 15.67 |
| LM72×LM95  | 90   | 80   | 94        | 99   | 8.87  | 6.31  | 6         | 8         | 20.35 | 19.42 | 45.19 | 45.10 | 3.61  | 3.76  | 15.07 | 22.37 | 65.96 | 70.65 | 22.18 | 12.75 |
| LM81×LM100 | 89   | 78   | 81        | 97   | 9.56  | 7.59  | 7         | 5         | 20.60 | 16.78 | 48.47 | 37.07 | 3.85  | 3.95  | 26.80 | 29.49 | 62.71 | 68.97 | 30.35 | 15.29 |
| LM82×LM02  | 89   | 78   | 90        | 101  | 12.21 | 8.63  | 6         | 5         | 21.82 | 20.48 | 41.81 | 50.96 | 4.37  | 3.79  | 26.33 | 29.35 | 56.46 | 67.85 | 30.97 | 14.06 |
| LM82×LM100 | 88   | 78   | 81        | 99   | 6.67  | 6.85  | 5         | 6         | 15.90 | 20.33 | 37.40 | 44.47 | 3.58  | 3.90  | 22.06 | 29.50 | 71.98 | 35.64 | 15.42 | 10.89 |
| LM82×LM22  | 104  | 78   | 97        | 94   | 10.35 | 10.54 | 6         | 9         | 21.91 | 20.53 | 48.37 | 43.97 | 4.93  | 4.19  | 20.21 | 43.09 | 48.84 | 48.76 | 25.29 | 14.03 |
| LM82×LM32  | 85   | 81   | 97        | 94   | 10.38 | 9.75  | 5         | 7         | 20.21 | 22.25 | 43.25 | 49.01 | 3.87  | 3.89  | 17.43 | 31.80 | 51.98 | 61.21 | 19.66 | 15.79 |
| LM82×LM44  | 87   | 82   | 93        | 95   | 8.15  | 11.44 | 6         | 6         | 17.37 | 16.25 | 42.44 | 38.55 | 3.89  | 3.11  | 27.71 | 40.05 | 52.27 | 39.05 | 25.88 | 9.62  |
| LM82×LM71  | 97   | 79   | 95        | 81   | 12.95 | 8.09  |           |           | 21.48 | 17.72 | 50.13 | 38.60 | 3.20  | 4.15  | 24.61 | 37.86 | 45.59 | 60.09 | 25.53 | 15.91 |
| LM82×LM72  | 92   | 83   | 92        | 74   | 9.76  | 5.75  | 5         | 6         | 17.58 | 17.56 | 41.96 | 37.92 | 4.24  | 4.19  | 27.75 | 22.77 | 68.58 | 63.49 | 24.63 | 15.64 |
| LM82×LM81  | 95   | 79   | 77        | 104  | 9.30  | 4.93  | 6         | 7         | 17.82 | 20.80 | 37.79 | 45.71 | 4.26  | 4.00  | 30.93 | 34.30 | 57.64 | 82.48 | 21.13 | 15.64 |
| LM82×LM95  | 86   | 76   | 96        | 96   | 8.56  | 5.39  | 6         | 4         | 25.71 | 18.75 | 42.51 | 40.70 | 5.45  | 4.89  | 28.56 | 42.96 | 43.79 | 79.75 | 27.42 | 9.35  |
| LM95×LM02  | 89   | 80   | 89        | 103  | 14.51 | 7.72  | 5         | 6         | 17.97 | 17.60 | 40.32 | 39.01 | 2.67  | 5.61  | 26.82 | 30.26 | 47.44 | 78.29 | 21.59 | 14.92 |
| LM95×LM100 | 83   | 76   | 92        | 99   | 7.75  | 9.57  | 5         | 6         | 15.79 | 19.67 | 35.58 | 42.80 | 5.51  | 3.78  | 23.53 | 36.68 | 64.67 | 71.89 | 29.10 | 15.79 |
| LM95×LM22  | 85   | 77   | 90        | 102  | 11.57 | 6.41  | 6         | 8         | 19.49 | 16.93 | 42.07 | 39.47 | 4.16  | 4.09  | 26.46 | 42.14 | 59.94 | 60.46 | 29.39 | 17.03 |
| LM95×LM32  | 88   | 77   | 93        | 101  | 9.91  | 7.87  | 6         | 6         | 17.90 | 21.35 | 44.56 | 45.51 | 4.27  | 3.95  | 30.27 | 40.63 | 58.76 | 63.21 | 28.28 | 13.05 |
| LM95×LM44  | 92   | 84   | 77        | 96   | 8.43  | 12.49 | 6         | 5         | 16.75 | 22.25 | 36.10 | 46.56 | 4.11  | 2.59  | 27.16 | 32.17 | 65.40 | 34.73 | 25.06 | 16.00 |
| LM95×LM81  | 86   | 75   | 92        | 99   | 9.84  | 12.71 | 5         | 5         | 17.67 | 21.46 | 42.64 | 45.77 | 3.82  | 3.49  | 29.71 | 41.04 | 64.58 | 68.88 | 30.17 | 15.53 |
| Mean       | 92   | 82   | 90        | 94   | 10.16 | 9.15  | 6         | 6         | 19.37 | 19.26 | 42.97 | 42.47 | 4.20  | 4.29  | 25.44 | 35.71 | 56.12 | 61.77 | 26.14 | 14.70 |
| P-value    | *    | **   | **        | **   | **    | ns    | ns        | ns        | *     | **    | ns    | *     | *     | *     | ns    | **    | ns    | **    | ns    | ns    |
| SED ‡      | 3.70 | 3.50 | 7.56      | 3.93 | 1.63  | 2     | 0.61      | 1.93      | 2.74  | 2.33  | 4.13  | 4.41  | 0.79  | 0.78  | 4.15  | 6.43  | 1.48  | 8.47  | 8.18  | 4.61  |
| LSD (5%) § | 7.43 | 7.02 | 15.1<br>5 | 7.88 | 3.28  | 4.02  | 1.22      | 3.82      | 5.48  | 4.67  | 8.88  | 8.84  | 1.58  | 1.56  | 8.32  | 12.89 | 35.04 | 16.99 | 16.40 | 9.24  |
| CV (%) ¶   | 4.00 | 4.30 | 8.40      | 4.10 | 16.10 | 21.90 | 10.7<br>0 | 31.7<br>0 | 14.10 | 12.10 | 10.30 | 10.40 | 18.70 | 18.20 | 16.30 | 18    | 31.10 | 13.70 | 31.30 | 31.40 |

\* and \*\* denotes significant at 5 and 1% probability levels, respectively.

† DTM, Number of days to maturity; PH, Plant height; SL, Spike length; TN, Number of productive tillers; SPS, Number of spikelets per spike; GPS, Grain per spike; GY, Grain yield; TKW, Thousand-kernel weight; SC, Stomatal conductance; CCI, Chlorophyll content index.

‡ SED, Standard error of difference.

§, LSD, Least significant difference.

¶ CV, Coefficient of variation.

**Table S4.** Specific combining ability effects for selected agronomic and physiological traits† among 45 crosses of bread wheat evaluated under irrigated (WW) in rainout shelter (RS) and glasshouse (GH) environments.

| Crosses    | DTM     |         | PH       |          | SL      |         | TN     |       | SPS     |         |
|------------|---------|---------|----------|----------|---------|---------|--------|-------|---------|---------|
|            | RS      | GH      | RS       | GH       | RS      | GH      | RS     | GH    | RS      | GH      |
| LM02×LM100 | -0.74   | 0.08    | -5.86    | -4.44    | -2.10** | -1.72   | -0.07  | -0.14 | -3.00*  | -3.02*  |
| LM02×LM22  | 1.44    | 3.77*   | -1.86    | -2.37    | 3.14**  | 2.59*   | 0.31   | -0.06 | 2.18    | 2.10    |
| LM02×LM32  | -0.31   | 0.65    | -6.61    | -7.27*   | 2.48**  | 0.27    | -0.55  | 0.46  | 0.73    | 0.16    |
| LM02×LM81  | -0.06   | -0.98   | 2.50     | 3.06     | -1.19   | 0.34    | 0.51   | 0.01  | 0.73    | -0.24   |
| LM100×LM44 | -0.37   | -1.42   | 1.70     | 1.08     | 0.06    | 0.45    | 0.49   | -0.20 | 0.71    | 0.53    |
| LM22×LM100 | -2.74*  | -3.79*  | 0.52     | 0.42     | -4.97** | -3.39** | 0.13   | 0.69  | -3.84** | -0.91   |
| LM22×LM81  | 1.69    | -0.17   | 2.35     | 2.56     | 3.14**  | 3.05**  | -0.50  | -0.45 | 0.40    | -1.88   |
| LM32×LM100 | 1.88    | 2.33    | 0.55     | 0.14     | 1.15    | 0.32    | -0.13  | -0.01 | 3.26**  | 2.30    |
| LM32×LM22  | -0.81   | -0.48   | 6.71     | 6.82*    | -1.70*  | -1.92   | -0.18  | -0.30 | -1.17   | 0.96    |
| LM32×LM81  | -3.62** | -7.48** | -5.46    | -5.58    | 3.40**  | 0.67    | -0.41  | -0.59 | 1.95    | 1.05    |
| LM44×LM02  | 4.13**  | 3.40    | 3.15     | 2.83     | 1.67*   | 1.72    | 0.52   | 0.81  | 1.15    | 0.60    |
| LM44×LM100 | 1.88    | 3.27    | -18.70** | -18.51** | -3.03** | -4.37** | 0.52   | 0.71  | -1.35   | -3.59** |
| LM44×LM22  | -2.93*  | -2.17   | 4.81     | 3.98     | -1.23   | -1.14   | -0.89* | -0.25 | -1.86   | -2.07   |
| LM44×LM32  | -1.31   | -1.54   | 0.49     | 0.43     | 4.18**  | 3.73**  | 0.21   | -0.02 | 1.65    | 1.36    |
| LM44×LM81  | -0.37   | 0.58    | -0.76    | -0.31    | 1.04    | 0.91    | 0.46   | 0.54  | 0.69    | 0.99    |
| LM71×LM02  | 2.82*   | 4.58*   | 10.16**  | 9.48**   | -2.65** | -1.16   | -0.49  | -0.85 | -0.82   | 2.90*   |
| LM71×LM100 | 0.13    | -0.73   | 12.17**  | 12.11**  | -1.27   | 1.36    | 0.16   | -0.20 | 1.58    | 1.78    |
| LM71×LM22  | 1.32    | 0.58    | -3.46    | -1.85    | 0.53    | 0.21    | 0.22   | -0.27 | -0.76   | -0.71   |
| LM71×LM32  | 2.07    | 1.46    | 1.15     | -0.58    | -3.97** | -0.85   | -0.49  | 0.40  | -0.75   | 1.61    |
| LM71×LM44  | -1.74   | -1.48   | 4.65     | 2.29     | 1.40    | 0.77    | -0.44  | -0.48 | 0.51    | -0.76   |
| LM71×LM72  | 1.38    | 2.65    | -2.09    | -0.68    | -2.79** | -3.51** | 0.12   | 0.80  | -1.64   | -1.13   |
| LM71×LM81  | 0.32    | 0.27    | 8.15*    | 7.22*    | 2.40**  | 1.45    | 0.32   | -0.28 | -0.25   | -0.40   |
| LM71×LM95  | -1.49   | -0.23   | 1.94     | 0.43     | -3.12** | -1.70   | -0.29  | -0.85 | -1.90   | -2.13   |
| LM72×LM02  | 0.32    | 0.46    | -3.04    | 1.12     | -0.98   | 0.37    | 0.66   | 1.33* | 0.66    | 0.36    |
| LM72×LM100 | -1.18   | -3.67   | 4.47     | 2.85     | -0.16   | -1.10   | 0.12   | -0.07 | -1.22   | -1.52   |
| LM72×LM22  | 0.01    | -0.10   | -11.50** | -3.63    | -4.88** | -3.63** | 0.55   | 0.87  | -1.83   | 0.61    |
| LM72×LM32  | -0.87   | 0.02    | 0.08     | -1.60    | -0.69   | 0.47    | -0.13  | -0.30 | 0.82    | 0.13    |
| LM72×LM44  | -1.93   | -1.35   | 10.98**  | 9.76**   | -2.52** | -0.53   | -0.28  | -1.03 | -2.53*  | -1.68   |



|            |        |        |          |          |          |         |        |        |         |        |
|------------|--------|--------|----------|----------|----------|---------|--------|--------|---------|--------|
| LM72×LM81  | -0.74  | -1.35  | 2.98     | 0.63     | 0.82     | 0.77    | -0.19  | 0.12   | 1.31    | 0.98   |
| LM72×LM95  | -0.43  | 1.83   | 0.00     | -1.73    | 2.75**   | 1.81    | -0.27  | -0.57  | 2.33    | 1.43   |
| LM81×LM100 | -0.74  | -1.73  | 1.75     | 0.26     | 2.51**   | 2.81**  | -0.25  | 0.14   | -0.39   | 0.36   |
| LM82×LM02  | 2.38   | 1.90   | -1.30    | 0.09     | 1.62*    | 1.33    | -0.02  | -0.48  | -1.22   | -1.51  |
| LM82×LM100 | -0.68  | 3.52   | 3.46     | 3.50     | -0.53    | -0.79   | -0.40  | 0.39   | 2.26    | 2.91*  |
| LM82×LM22  | -2.49  | -0.98  | -0.90    | 2.31     | 2.55**   | 2.01    | 0.27   | -0.21  | 0.27    | 0.35   |
| LM82×LM32  | -1.18  | -2.79  | 7.58     | 7.01*    | 2.20**   | 0.61    | -0.25  | -0.88  | 1.67    | 1.63   |
| LM82×LM71  | 4.07** | 5.46** | 0.58     | -0.16    | 2.17**   | 1.82    | -0.41  | -0.55  | 2.81*   | 1.95   |
| LM82×LM72  | 3.01*  | 2.08   | -4.53    | -5.67    | -1.17    | -1.34   | 0.28   | -0.48  | 1.99    | 1.38   |
| LM82×LM81  | -1.81  | -1.42  | 3.63     | 4.67     | -2.55**  | -2.66*  | 0.31   | 0.74   | 1.47    | 0.63   |
| LM82×LM95  | 0.51   | 0.77   | -0.99    | -2.83    | 3.70**   | 2.91**  | 0.37   | 0.21   | -3.41** | -2.62* |
| LM95×LM02  | -0.87  | -1.29  | 3.23     | 2.72     | -1.92**  | -1.63   | 0.56   | 0.53   | 0.83    | 1.84   |
| LM95×LM100 | -0.18  | -2.29  | -2.16    | -3.65    | 4.57**   | 3.47**  | 0.02   | 0.04   | -0.19   | -1.57  |
| LM95×LM22  | -1.87  | -1.10  | 0.64     | 2.42     | -2.17**  | -2.29*  | -0.47  | -0.72  | 0.77    | -0.17  |
| LM95×LM32  | -1.24  | -3.17  | -8.00*   | -4.44    | 0.66     | 0.34    | 0.04   | 0.34   | -2.19   | -1.62  |
| LM95×LM44  | 0.07   | -0.48  | -14.88** | -15.34** | -1.10    | -1.46   | -0.48  | 0.44   | -1.20   | -1.54  |
| LM95×LM81  | 3.26** | 2.52   | -8.19*   | -9.58**  | -1.43*   | -1.39   | 0.47   | 0.69   | -1.21   | -1.84  |
| LM02×LM100 | -5.70  | -3.02* | 0.08     | 0.18     | 2.88     | 6.35    | -9.22  | -9.08  | -1.01   | -2.35  |
| LM02×LM22  | -0.06  | 2.10   | 0.69     | 1.07     | 4.12     | 1.57    | -9.63  | 10.90  | -11.06* | -8.40  |
| LM02×LM32  | 0.03   | 0.16   | 0.14     | -0.43    | 2.41     | 5.62    | -0.31  | 16.51  | -2.62   | 1.65   |
| LM02×LM81  | 1.71   | -0.24  | -1.30**  | -1.20    | -7.80    | -6.84   | 28.97* | 78.72* | -2.76   | -4.01  |
| LM100×LM44 | 3.50   | 0.53   | 0.74     | 1.13     | 4.53     | 4.43    | -8.61  | -23.69 | 4.98    | 12.14  |
| LM22×LM100 | 0.01   | -0.91  | -0.76    | -1.40    | -12.56** | -13.37* | -1.42  | -43.15 | 2.76    | 6.12   |
| LM22×LM81  | -4.26  | -1.88  | 0.28     | 0.08     | 10.60**  | 8.50    | -2.41  | -24.58 | 9.34    | -4.27  |
| LM32×LM100 | 5.77   | 2.30   | 0.29     | 0.47     | -5.02    | -3.83   | 11.21  | 30.46  | 3.15    | 2.56   |
| LM32×LM22  | -1.00  | 0.96   | -0.16    | 0.10     | 0.84     | -2.42   | -8.58  | -36.10 | -2.77   | -3.46  |
| LM32×LM81  | 4.20   | 1.05   | 0.02     | 0.43     | -2.89    | -4.24   | -0.73  | -11.42 | -5.52   | -7.17  |
| LM44×LM02  | 2.74   | 0.60   | -1.52**  | -1.95*   | -3.87    | -4.46   | 11.03  | 2.72   | -0.63   | -5.71  |
| LM44×LM100 | -1.22  | -3.59  | 1.32**   | 0.72     | 6.93     | 7.57    | -18.30 | -12.89 | -0.25   | -10.23 |
| LM44×LM22  | -2.66  | -2.07  | -0.72    | -0.92    | -4.67    | -7.17   | -4.08  | 9.61   | -2.01   | 9.14   |
| LM44×LM32  | -4.02  | 1.36   | 1.00*    | 1.26     | 4.89     | 5.33    | -3.79  | -2.45  | 4.72    | 1.87   |
| LM44×LM81  | 2.32   | 0.99   | -0.61    | -0.42    | -2.20    | -1.37   | 1.69   | -0.86  | -7.52   | -4.41  |
| LM71×LM02  | 4.88   | 2.90   | 1.45**   | 1.31     | 1.85     | 0.50    | 7.62   | 21.66  | 6.45    | 13.28* |

|            |       |         |         |         |          |          |          |         |       |         |
|------------|-------|---------|---------|---------|----------|----------|----------|---------|-------|---------|
| LM71×LM100 | -0.53 | 1.78    | -1.02*  | -0.60   | -2.93    | -2.52    | 15.77    | 2.70    | 5.78  | 5.55    |
| LM71×LM22  | 0.70  | -0.71   | 0.32    | 0.62    | 0.99     | 0.15     | 0.82     | 15.40   | 7.05  | 11.09   |
| LM71×LM32  | -2.34 | 1.61    | -1.13*  | -1.41   | -2.21    | 0.57     | -6.48    | -41.31  | 4.76  | 4.23    |
| LM71×LM44  | -4.75 | -0.76   | 0.46    | 0.57    | 0.31     | 2.93     | 4.11     | 10.40   | 6.80  | 1.18    |
| LM71×LM72  | -0.32 | -1.13   | -0.15   | 0.31    | 1.72     | 1.38     | -3.81    | 7.45    | 3.82  | 4.20    |
| LM71×LM81  | 1.61  | -0.40   | 1.26**  | 1.22    | 6.44     | 5.40     | 13.76    | -39.13  | 0.78  | 4.56    |
| LM71×LM95  | -3.84 | -2.13   | -2.04** | -2.09** | -9.32*   | -10.93*  | -7.15    | 4.52    | -5.86 | -7.53   |
| LM72×LM02  | 4.81  | 0.36    | 0.58    | -0.71   | 0.85     | 3.16     | 9.11     | 43.19   | -0.76 | -2.16   |
| LM72×LM100 | -2.81 | -1.52   | 0.46    | -0.25   | -1.71    | -3.36    | -16.43   | -65.54* | 1.62  | 5.09    |
| LM72×LM22  | 2.05  | 0.61    | -1.03*  | -0.99   | -8.36*   | -10.97*  | 2.09     | 4.22    | -9.20 | -11.70  |
| LM72×LM32  | -0.42 | 0.13    | 0.60    | 1.42    | 6.59     | 7.06     | 10.64    | 3.17    | 0.78  | -2.74   |
| LM72×LM44  | -2.48 | -1.68   | 0.77    | 1.11    | 3.36     | 4.01     | -37.73** | -33.58  | 0.58  | -3.25   |
| LM72×LM81  | 0.06  | 0.98    | 0.74    | 1.11    | 3.91     | 5.25     | 1.73     | 6.51    | 0.38  | -4.48   |
| LM72×LM95  | 0.13  | 1.43    | -0.47   | -0.64   | -3.32    | -3.32    | 28.14*   | 50.58   | 2.05  | 10.03   |
| LM81×LM100 | -1.36 | 0.36    | -0.27   | 0.28    | 0.48     | 2.54     | 32.33**  | 64.58*  | -3.47 | -4.54   |
| LM82×LM02  | -2.83 | -1.51   | 1.38**  | 1.77*   | 10.67**  | 9.46*    | 9.24     | -29.47  | 0.20  | -0.98   |
| LM82×LM100 | 5.44  | 2.91*   | -0.12   | -0.86   | -5.17    | -7.78    | -18.95   | 31.68   | -0.49 | 4.13    |
| LM82×LM22  | -0.07 | 0.35    | -0.59   | -0.05   | 0.91     | 2.24     | 5.16     | -44.04  | 2.06  | 9.09    |
| LM82×LM32  | 3.50  | 1.63    | 0.26    | 1.00    | -2.09    | -4.40    | -15.55   | 18.26   | -1.66 | -2.79   |
| LM82×LM71  | 6.07  | 1.95    | -0.67   | -1.36   | -1.58    | -0.07    | -22.80   | 1.23    | 1.09  | 10.41   |
| LM82×LM72  | 0.09  | 1.38    | -0.29   | -0.40   | 3.15     | 5.39     | 13.40    | -31.59  | -0.99 | -5.91   |
| LM82×LM81  | 1.90  | 0.63    | 1.11*   | 0.76    | 2.68     | 0.26     | -13.10   | 13.10   | 0.43  | 3.10    |
| LM82×LM95  | -4.83 | -2.62** | 0.67    | 0.94    | 3.46     | 2.66     | -3.34    | -47.86  | 2.37  | -13.81* |
| LM95×LM02  | 1.99  | 1.84    | -0.26   | 0.29    | -13.98** | -14.96** | 13.20    | 39.47   | -6.25 | 0.77    |
| LM95×LM100 | -1.72 | -1.57   | -1.12*  | -1.75*  | -0.59    | -0.66    | 15.64    | 22.21   | 0.29  | -8.86   |
| LM95×LM22  | 1.25  | -0.17   | -0.01   | -0.55   | 4.84     | 5.81     | -16.90   | 1.53    | -7.41 | -10.80  |
| LM95×LM32  | -4.16 | -1.62   | -0.51   | -0.62   | 2.52     | 3.47     | 2.29     | 18.25   | -2.38 | -8.11   |
| LM95×LM44  | -0.53 | -1.54   | -0.52   | -0.40   | -4.70    | -2.66    | 14.75    | 40.34   | 6.92  | 16.49** |
| LM95×LM81  | -2.81 | -1.84   | 0.67    | 0.86    | 3.06     | 3.70     | -23.40   | -72.66* | -4.51 | 0.95    |

\* and \*\* denote significantly different from zero at 5 and 1% probability level of a t-test statistic, respectively..

† DTM, Number of days to maturity; PH, Plant height; SL, Spike length; TN, Number of productive tillers; SPS, Number of spikelets per spike; GPS, Grain per spike; GY, Grain yield; TKW, Thousand-kernel weight; SC, Stomatal conductance; CCI, Chlorophyll content index.

**Table S5.** Specific combining ability effects for studied agronomic and physiological traits† among 45 crosses of bread wheat evaluated under terminal drought (TD) in rainout shelter (RS) and glasshouse (GH) environments.

| Crosses    | DTM     |        | PH      |          | SL      |         | TN     |       | SPS   |         |
|------------|---------|--------|---------|----------|---------|---------|--------|-------|-------|---------|
|            | RS      | GH     | RS      | GH       | RS      | GH      | RS     | GH    | RS    | GH      |
| LM02×LM100 | -0.69   | 0.03   | -2.84   | 1.54     | 1.35    | -1.23   | 0.75*  | -1.03 | 3.28* | -2.60   |
| LM02×LM22  | 0.43    | 4.47*  | 1.62    | -3.78    | -2.71** | 2.55*   | 0.57   | -0.70 | -1.08 | 1.42    |
| LM02×LM32  | -0.94   | -1.47  | -4.46   | -5.82*   | 1.93    | 2.09    | -0.07  | 0.14  | 3.17* | -0.19   |
| LM02×LM81  | 2.74    | -0.85  | 3.32    | 3.68     | -1.99   | -1.79   | 0.43   | -0.62 | 0.72  | -0.29   |
| LM100×LM44 | -0.01   | -0.66  | 10.21** | 1.30     | 3.01**  | -2.39   | -0.18  | 1.69  | 1.43  | 0.25    |
| LM22×LM100 | -2.01   | -1.85  | 3.10    | -3.29    | -0.82   | -0.14   | -0.13  | -0.09 | -2.09 | 0.18    |
| LM22×LM81  | 1.56    | -0.47  | 2.45    | 5.72*    | 2.20*   | 0.16    | -0.40  | 1.34  | -1.10 | -2.79   |
| LM32×LM100 | -0.19   | 2.47   | -5.50   | -2.86    | -1.20   | 2.25    | -0.33  | -0.29 | -1.54 | 3.25*   |
| LM32×LM22  | -0.88   | -1.66  | -7.90   | 3.52     | -1.78   | -1.49   | -0.63  | -0.45 | -2.80 | 0.77    |
| LM32×LM81  | 0.06    | -7.53* | 0.45    | -13.73** | 1.96    | 3.17**  | -0.21  | -1.53 | -1.14 | 0.73    |
| LM44×LM02  | 1.68    | 2.53   | -0.54   | -0.01    | 1.14    | 0.61    | -0.14  | 0.21  | 0.33  | 0.89    |
| LM44×LM100 | -5.63** | 3.15   | 7.76    | -21.95** | -0.68   | -1.82   | -0.03  | 2.38* | -1.23 | -4.04** |
| LM44×LM22  | -2.38   | -1.66  | -3.63   | 10.13**  | -2.90** | -0.11   | 0.30   | -1.09 | 2.03  | -1.22   |
| LM44×LM32  | -1.88   | -1.85  | 5.83    | 3.04     | 0.69    | 4.49**  | -0.79* | -1.01 | -0.90 | 2.24    |
| LM44×LM81  | -6.32** | 1.03   | -4.74   | -2.15    | -0.30   | 1.07    | -0.53  | 0.16  | 1.18  | 0.43    |
| LM71×LM02  | 12.93** | 3.97   | 8.03    | 8.61**   | -1.54   | -4.25** | 0.27   | 0.65  | -1.97 | 2.05    |

|            |         |         |          |          |         |         |        |         |         |         |
|------------|---------|---------|----------|----------|---------|---------|--------|---------|---------|---------|
| LM71×LM100 | 2.24    | 0.34    | -10.31*  | 14.53**  | 0.27    | -1.92   | 0.37   | 1.25    | -1.58   | 1.51    |
| LM71×LM22  | 1.81    | 1.47    | -6.72    | 0.86     | -2.67** | 0.36    | -0.13  | -1.71   | -1.44   | -1.29   |
| LM71×LM32  | 7.49**  | 1.59    | -1.90    | -0.10    | -0.23   | -1.79   | -0.64  | -0.18   | -0.97   | 1.55    |
| LM71×LM44  | -5.76** | -1.72   | 1.87     | 4.97*    | 2.44*   | -0.03   | -0.18  | 0.47    | 2.70    | -0.79   |
| LM71×LM72  | -3.76   | 1.59    | -2.72    | 0.68     | 1.78    | -3.70** | 0.29   | 2.27    | 0.87    | -2.29   |
| LM71×LM81  | -4.69*  | -0.53   | 1.79     | 8.19**   | 0.67    | 1.25    | 0.58   | -0.58   | -0.54   | 0.80    |
| LM71×LM95  | -6.44** | 0.40    | 1.69     | 3.95     | -1.92   | -3.60** | -0.41  | -0.95   | -0.87   | -1.37   |
| LM72×LM02  | 10.87** | 0.28    | 3.92     | -1.03    | 0.67    | 1.79    | 0.13   | 2.91**  | 2.47    | 1.23    |
| LM72×LM100 | -2.88   | -3.35   | -0.23    | 0.28     | 0.91    | -1.20   | 0.35   | 1.02    | 0.76    | -1.43   |
| LM72×LM22  | 7.87**  | -0.66   | 3.57     | -1.75    | 0.14    | -3.33** | 0.38   | 1.62    | -1.60   | 1.19    |
| LM72×LM32  | -0.63   | 0.15    | -1.83    | -1.08    | -0.15   | -0.86   | 0.15   | 0.06    | -1.54   | 1.16    |
| LM72×LM44  | 3.43    | -0.97   | 5.90     | 11.24**  | -0.86   | -0.40   | -0.21  | -1.48   | 0.23    | -2.76   |
| LM72×LM81  | -2.82   | -0.03   | 2.20     | -2.82    | -0.89   | 0.33    | 0.12   | -0.22   | 0.13    | 0.44    |
| LM72×LM95  | -7.51** | 2.34    | 2.11     | -0.92    | 0.44    | 2.40    | -0.45  | 0.36    | -0.04   | 1.99    |
| LM81×LM100 | -0.94   | -1.53   | 2.51     | 0.15     | 0.38    | 2.69*   | -0.29  | -0.87   | 0.20    | 0.83    |
| LM82×LM02  | 1.56    | 1.78    | -2.36    | 2.54     | 3.99**  | -0.84   | -0.34  | 0.35    | -1.81   | -1.54   |
| LM82×LM100 | 5.12*   | 2.15    | -0.51    | 4.01     | -3.78** | 0.63    | -0.44  | -0.51   | 0.68    | 4.13**  |
| LM82×LM22  | -4.13   | -0.91   | -6.64    | 3.62     | -0.41   | 2.68*   | 0.77** | 0.02    | 0.44    | -0.48   |
| LM82×LM32  | -3.32   | -2.03   | -1.93    | 7.78**   | 1.81    | 1.44    | 0.19   | -1.60   | 1.22    | 1.26    |
| LM82×LM71  | 4.31    | 4.47*   | -11.61** | -5.10*   | -2.40*  | 1.25    | 0.01   | -1.10   | -4.06** | 1.94    |
| LM82×LM72  | 3.87    | 2.34    | -6.24    | -14.07** | 1.70    | 2.83*   | 0.13   | -0.90   | 1.59    | 1.45    |
| LM82×LM81  | -1.88   | -1.22   | -0.66    | 3.97     | 0.19    | -2.47*  | -0.52  | 0.57    | 1.96    | 0.49    |
| LM82×LM95  | -5.07*  | 0.65    | 3.98     | 0.39     | -2.57** | 1.57    | 0.36   | -0.40   | -4.26** | -4.14** |
| LM95×LM02  | 1.87    | -0.35   | 3.93     | 4.04     | -1.93   | -2.88*  | 0.76*  | 1.87    | 1.57    | 1.00    |
| LM95×LM100 | 2.12    | -1.91   | 1.37     | -1.14    | -0.34   | 5.03**  | -0.19  | -0.19   | 2.19    | -2.04   |
| LM95×LM22  | -1.57   | -2.03   | 4.29     | 0.32     | -0.83   | -2.35   | 0.24   | -2.17   | 5.76**  | -0.65   |
| LM95×LM32  | -4.82*  | -4.03   | -4.46    | -2.87    | 3.21**  | -0.60   | 0.30   | 0.21    | -1.58   | -1.32   |
| LM95×LM44  | -0.01   | 0.84    | 1.88     | -14.12** | -0.92   | -2.07   | -0.19  | -0.10   | -2.02   | -0.94   |
| LM95×LM81  | 5.24 *  | 1.28    | 3.97     | -10.46** | 2.90**  | 0.63    | -0.02  | 0.19    | 1.24    | -1.02   |
| LM02×LM100 | 8.01*   | -7.66** | -0.67    | -0.20    | 0.76    | -7.92*  | 1.58   | 3.51    | 1.02    | 1.02    |
| LM02×LM22  | 3.08    | 3.88    | -0.27    | 0.08     | -3.53   | 0.30    | -1.82  | -8.70   | 2.14    | -3.40   |
| LM02×LM32  | 2.56    | 1.16    | -0.60    | 0.88     | 2.60    | -2.49   | -10.64 | 24.08** | 0.85    | 1.75    |
| LM02×LM81  | 4.26    | -2.13   | -0.36    | -0.70    | 0.09    | -0.37   | -16.92 | -8.37   | 0.51    | -1.86   |

|            |        |         |        |         |         |          |        |          |          |       |
|------------|--------|---------|--------|---------|---------|----------|--------|----------|----------|-------|
| LM100×LM44 | 1.25   | 1.29    | -0.28  | 0.78    | 0.24    | -1.55    | 6.37   | 4.84     | 2.04     | 4.79  |
| LM22×LM100 | -4.95  | 0.91    | 1.35** | -0.44   | -2.05   | 0.94     | 2.42   | 4.07     | 1.86     | 2.78  |
| LM22×LM81  | -4.97  | -7.13** | 1.02*  | 0.33    | 3.01    | 7.00     | 6.02   | 16.95**  | 0.08     | -2.86 |
| LM32×LM100 | -4.86  | 8.18**  | 0.44   | -0.62   | 1.95    | 8.32*    | 0.77   | -7.17    | 1.08     | -0.65 |
| LM32×LM22  | -4.37  | 1.52    | -0.63  | -0.11   | -3.08   | -4.23    | 12.22  | -29.22** | -9.57*   | -1.57 |
| LM32×LM81  | -1.60  | -1.78   | 0.89   | -0.02   | -2.63   | 1.52     | 10.52  | 8.00     | 5.20     | -3.47 |
| LM44×LM02  | 0.73   | -0.05   | 0.33   | -0.22   | -2.39   | 1.92     | 0.15   | -16.13** | 1.31     | -2.30 |
| LM44×LM100 | -1.75  | 0.45    | -0.28  | 0.64    | -3.10   | 9.85**   | 1.23   | -1.87    | 4.20     | -1.93 |
| LM44×LM22  | 2.68   | -5.03   | -0.19  | -0.22   | -5.26*  | -3.51    | -3.16  | -22.90** | -7.99    | 2.66  |
| LM44×LM32  | 2.43   | 0.90    | -0.58  | -0.65   | 3.75    | 1.30     | 7.70   | 8.14     | 2.17     | 0.91  |
| LM44×LM81  | -2.89  | 11.09** | -0.05  | 0.81    | 1.26    | 6.79     | -8.73  | -11.71** | -3.19    | 0.59  |
| LM71×LM02  | -3.95  | 2.30    | 0.74   | -0.22   | 2.18    | -6.51    | -12.55 | 8.26     | 1.91     | 0.94  |
| LM71×LM100 | -3.67  | -0.22   | -0.19  | 0.07    | 5.42*   | -3.43    | 3.26   | 24.70**  | -4.62    | 1.58  |
| LM71×LM22  | 2.32   | -0.48   | -0.09  | -0.52   | -1.06   | -3.38    | 8.19   | -24.01** | -6.71    | 6.45* |
| LM71×LM32  | -3.89  | 0.42    | 0.78   | -1.44** | 3.79    | -6.09    | 1.61   | -13.26** | -2.19    | -1.81 |
| LM71×LM44  | -3.70  | -1.24   | 0.56   | 1.18**  | -0.33   | -2.52    | -9.59  | 31.59**  | 1.31     | -0.83 |
| LM71×LM72  | 0.93   | -2.52   | -0.24  | -0.09   | 1.86    | 5.10     | 4.94   | 6.83     | 4.92     | 2.98  |
| LM71×LM81  | -0.58  | -0.04   | -0.99* | 0.03    | 3.84    | 7.20     | -8.26  | -4.71    | 4.79     | 2.54  |
| LM71×LM95  | -2.56  | 0.84    | -1.12* | 0.56    | 1.99    | -10.19** | -1.94  | 6.16     | -12.53** | -3.01 |
| LM72×LM02  | 5.99*  | 0.91    | 0.48   | 0.22    | -3.94   | 8.06*    | -3.65  | -1.90    | 3.07     | 0.54  |
| LM72×LM100 | -0.59  | -4.27   | 0.63   | 0.31    | 2.40    | -2.61    | 6.78   | 10.86*   | -1.78    | -1.61 |
| LM72×LM22  | -2.57  | 3.70    | -0.89  | -0.44   | 2.74    | 2.53     | -11.46 | 1.35     | 5.55     | -3.88 |
| LM72×LM32  | 0.57   | 2.84    | 0.36   | -0.41   | 5.04    | 5.62     | 5.20   | 1.60     | 0.87     | -0.99 |
| LM72×LM44  | -0.60  | -6.70** | -0.26  | 0.11    | -1.07   | 1.33     | -18.63 | -12.71** | -4.35    | -2.12 |
| LM72×LM81  | -0.44  | -1.48   | 0.61   | 0.05    | -0.90   | -1.72    | 19.49  | 12.42**  | 9.76*    | 0.40  |
| LM72×LM95  | -1.98  | 5.28*   | -0.09  | 0.25    | -7.36** | -1.19    | 0.92   | 2.56     | -5.50    | 2.31  |
| LM81×LM100 | 2.69   | 1.90    | 0.66   | 0.05    | -0.23   | 2.09     | 6.24   | 8.51     | -4.19    | -0.39 |
| LM82×LM02  | -2.39  | -4.20   | -1.22* | 1.28**  | 1.05    | -4.56    | -13.52 | 8.26     | -5.13    | -0.21 |
| LM82×LM100 | 3.85   | 4.54    | -0.16  | -0.28   | -4.32   | 1.07     | 3.29   | -7.50    | 4.03     | 5.40* |
| LM82×LM22  | -0.04  | -3.39   | -0.47  | 0.46    | -0.68   | 4.07     | 13.28  | 2.61     | -1.96    | 2.93  |
| LM82×LM32  | -2.14  | 6.69**  | 0.43   | -0.32   | 1.01    | -3.45    | -2.00  | 0.78     | 6.51     | -0.51 |
| LM82×LM71  | -5.80* | 3.65    | -0.41  | -0.63   | 1.16    | -2.88    | 5.39   | -25.38** | -1.83    | 1.80  |

|            |        |        |        |       |          |          |        |          |       |       |
|------------|--------|--------|--------|-------|----------|----------|--------|----------|-------|-------|
| LM82×LM72  | 4.53   | 2.03   | 0.84   | -0.43 | 2.24     | -3.39    | 4.27   | 4.51     | 2.50  | -2.21 |
| LM82×LM81  | 1.61   | -0.88  | 0.39   | 0.60  | -2.69    | 2.21     | 7.19   | 15.58**  | 1.36  | 2.07  |
| LM82×LM95  | -0.70  | -5.42* | -0.68  | -0.89 | 2.15     | 7.02     | -5.24  | -18.09** | 1.24  | -4.02 |
| LM95×LM02  | 3.37   | 3.17   | -0.56  | -0.27 | -10.35** | -12.69** | 10.96  | 9.96*    | -3.79 | -1.06 |
| LM95×LM100 | 4.85   | -2.37  | -0.05  | 0.33  | -3.97    | 0.26     | -11.38 | -33.09** | -2.83 | -2.77 |
| LM95×LM22  | 0.98   | -2.38  | 1.36** | 0.89  | 3.50     | 6.91     | -11.71 | 19.61**  | 3.76  | -3.45 |
| LM95×LM32  | -1.60  | -1.89  | 0.15   | -0.67 | 2.61     | 2.97     | -5.00  | -0.56    | -0.99 | -2.65 |
| LM95×LM44  | -1.10  | -5.07  | 0.01   | 0.37  | 2.77     | -10.28** | 16.08  | 5.77     | 0.91  | 2.38  |
| LM95×LM81  | 6.99** | -1.30  | -0.69  | -0.48 | -0.48    | 0.59     | -9.86  | -4.20    | 4.20  | 2.74  |

\* and \*\* denote significant at 5 and 1% probability level of a t-test statistic, respectively.

† DTM, Number of days to maturity; PH, Plant height; SL, Spike length; TN, Number of productive tillers; SPS, Number of spikelets per spike; GPS, Grain per spike; GY, Grain yield; TKW, Thousand-kernel weight; SC, Stomatal conductance; CCI, Chlorophyll content index.
